# Supplementary material for: Determination of multi-residue PCBs in air by real-time fluorescent quantitative immuno-PCR assay
Source: Royal Society of Chemistry journal article supplement (doi:10.1039/c4ay00222a), 2014-01-01
Supplement: c4ay00222a1.pdf [file c4ay00222a1.pdf]

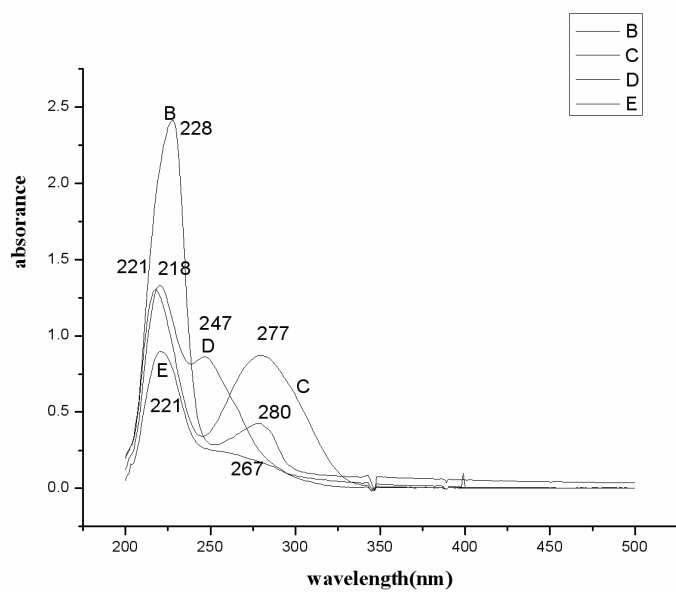

Fig. 3. Absorption spectra of BSA (curve B), PCB12-BSA (curve C), PCB37-BSA (curve D), PCB77-BSA (curve E) conjugates 0.01 mol L<sup>-1</sup> in 0.02 mol L<sup>-1</sup> PH 7.4 PBS solutions
